# Supplementary material
Source: publisher figshare collection journal article supplement (https://acs.figshare.com/ndownloader/files/17430500)
Supplement: Supplementary file 1 [file 17430500]

# **Comparative Study of the Adsorption of Thiol and Isocyanide Molecules on Silver Surface by In Situ Surface-Enhanced Raman Scattering**

Jaewan Ahn, Shi Shi, Bonnie Vannatter, and Dong Qin\*

School of Materials Science and Engineering, Georgia Institute of Technology, Atlanta, Georgia  
30332, United States

\*Corresponding author: [dong.qin@mse.gatech.edu](mailto:dong.qin@mse.gatech.edu)

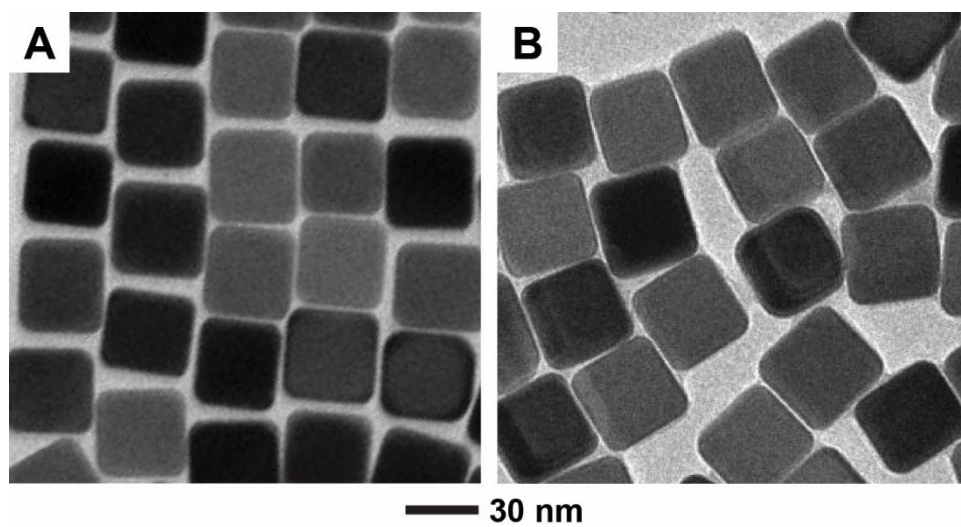

**Figure S1.** TEM images of (A) the as-synthesized Ag nanocubes and (B) the acid-treated Ag nanocubes.

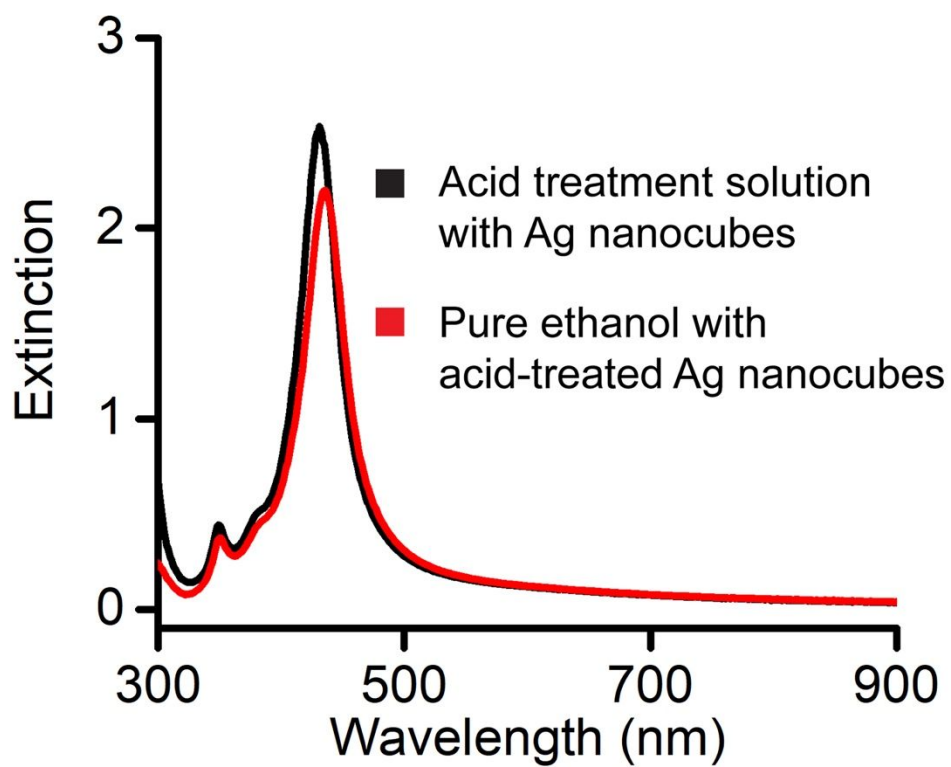

**Figure S2.** UV-vis spectra of Ag nanocubes dispersed in an acid treatment solution (black curve) and the acid-treated Ag nanocubes re-dispersed in pure ethanol (red curve).

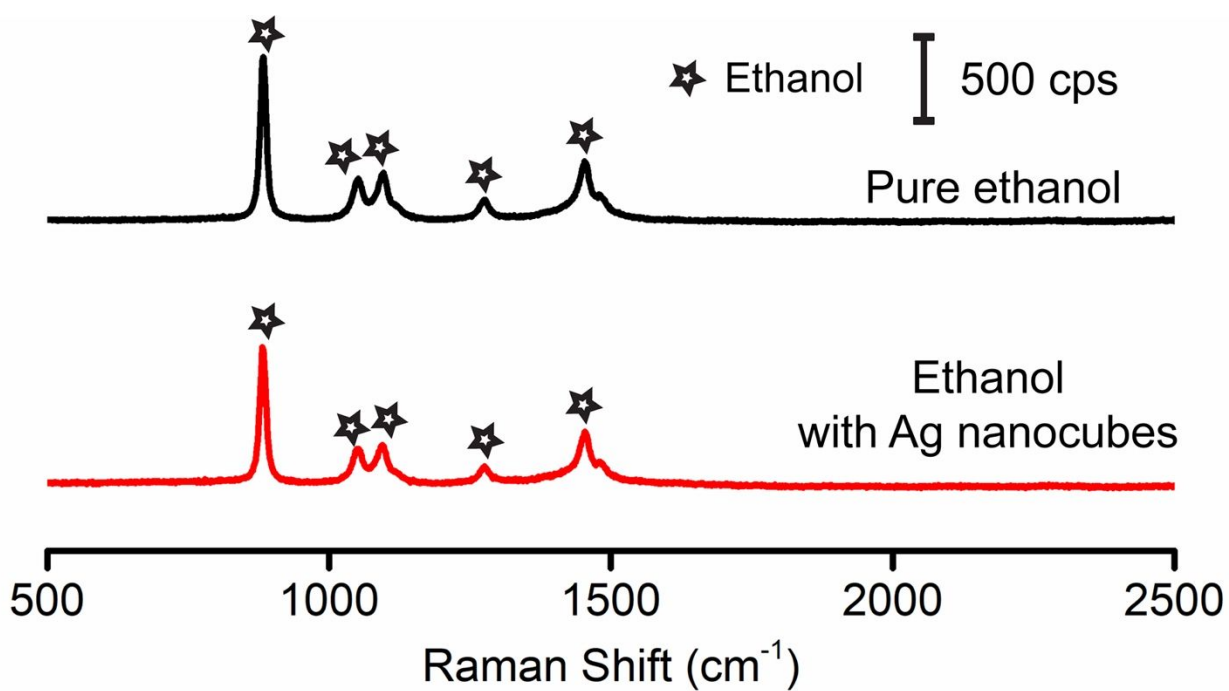

**Figure S3.** Raman spectra recorded from pure ethanol (black) and ethanol containing as-prepared Ag nanocubes (red).

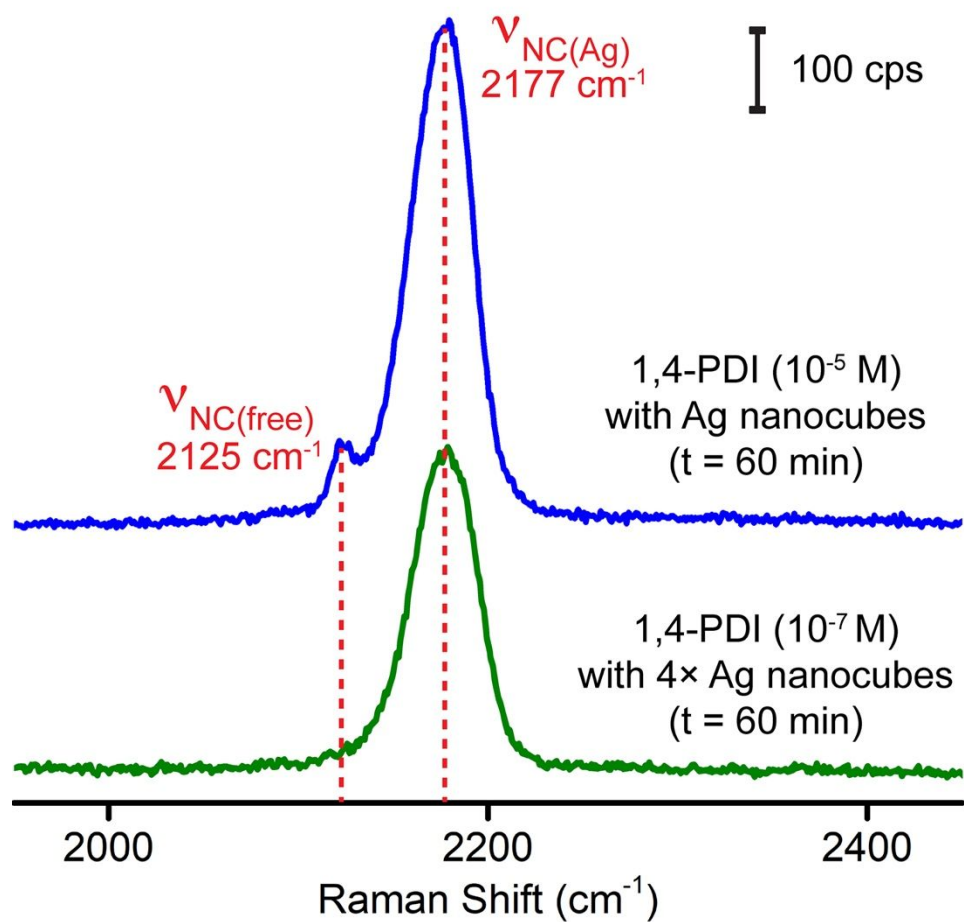

**Figure S4.** The SERS spectra of 1,4-PDI collected at  $t=60$  min by using (A) Ag nanocubes prepared by 1,4-PDI ethanol solutions at 10<sup>-5</sup> M and (B) Ag nanocubes prepared by 1,4-PDI ethanol solutions at 10<sup>-7</sup> M with the number of particles quadrupled from those in (A).

**Table S1.** Raman data of the characteristic peak of Si as periodically measured throughout all the SERS experiments.

| #                     | Centre        | Width       | Height        |
|-----------------------|---------------|-------------|---------------|
| 1                     | 520.35        | 5.11        | 110652        |
| 2                     | 520.38        | 4.97        | 110645        |
| 3                     | 520.35        | 5.02        | 115457        |
| 4                     | 520.26        | 5.02        | 108978        |
| 5                     | 520.25        | 5.03        | 110601        |
| 6                     | 520.20        | 5.30        | 108247        |
| 7                     | 520.32        | 4.87        | 107954        |
| 8                     | 520.39        | 5.24        | 112402        |
| 9                     | 520.29        | 5.27        | 108795        |
| 10                    | 520.10        | 5.09        | 112784        |
| 11                    | 520.34        | 5.54        | 115776        |
| 12                    | 520.44        | 5.07        | 117896        |
| 13                    | 520.22        | 5.42        | 119255        |
| 14                    | 520.10        | 5.09        | 112784        |
| 15                    | 520.32        | 4.87        | 122134        |
| 16                    | 520.32        | 5.48        | 117520        |
| 17                    | 520.32        | 5.16        | 116003        |
| 18                    | 520.31        | 5.42        | 113424        |
| 19                    | 520.37        | 5.11        | 118993        |
| 20                    | 520.19        | 5.61        | 106963        |
| Mean                  | <b>520.29</b> | <b>5.19</b> | <b>113363</b> |
| Standard<br>Deviation | <b>0.09</b>   | <b>0.22</b> | <b>4346</b>   |
